# Supplementary material
Source: PubMed Central journal article supplement (PMC1618103)
Supplement: 7601359s3.pdf [file 7601359s3.pdf]

## Supplementary Figure 5

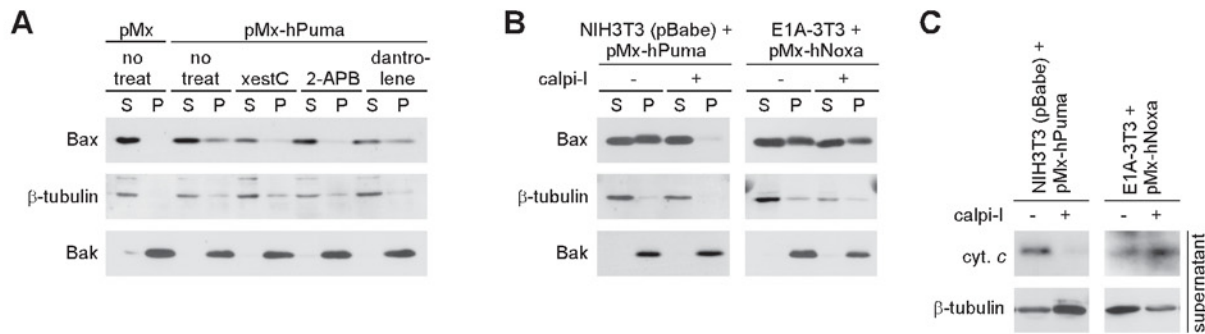

**Supplementary Figure 5** Involvement of  $\text{Ca}^{2+}$ /calpain system in Puma-induced apoptosis of NIH3T3 cells.

(A) Puma-induced Bax membrane insertion under the blockade of ER calcium channels. Puma-induced Bax membrane insertion in NIH3T3 cells was analyzed in the presence of the blockers of  $\text{InsP}_3\text{R}$  (xestC and 2-APB) or the blocker of RyR (dantrolene).

(B, C) Role of calpain in the upstream of MOMP in Puma-induced apoptosis. The effects of calpain inhibitor I (calpi-I) treatment on Bax membrane insertion (B) and cytochrome *c* (cyt. *c*) release (C) during Puma-induced apoptosis of control NIH3T3 cells and Noxa-induced apoptosis of E1A-3T3 cells were analyzed.

## Supplementary Figure 6

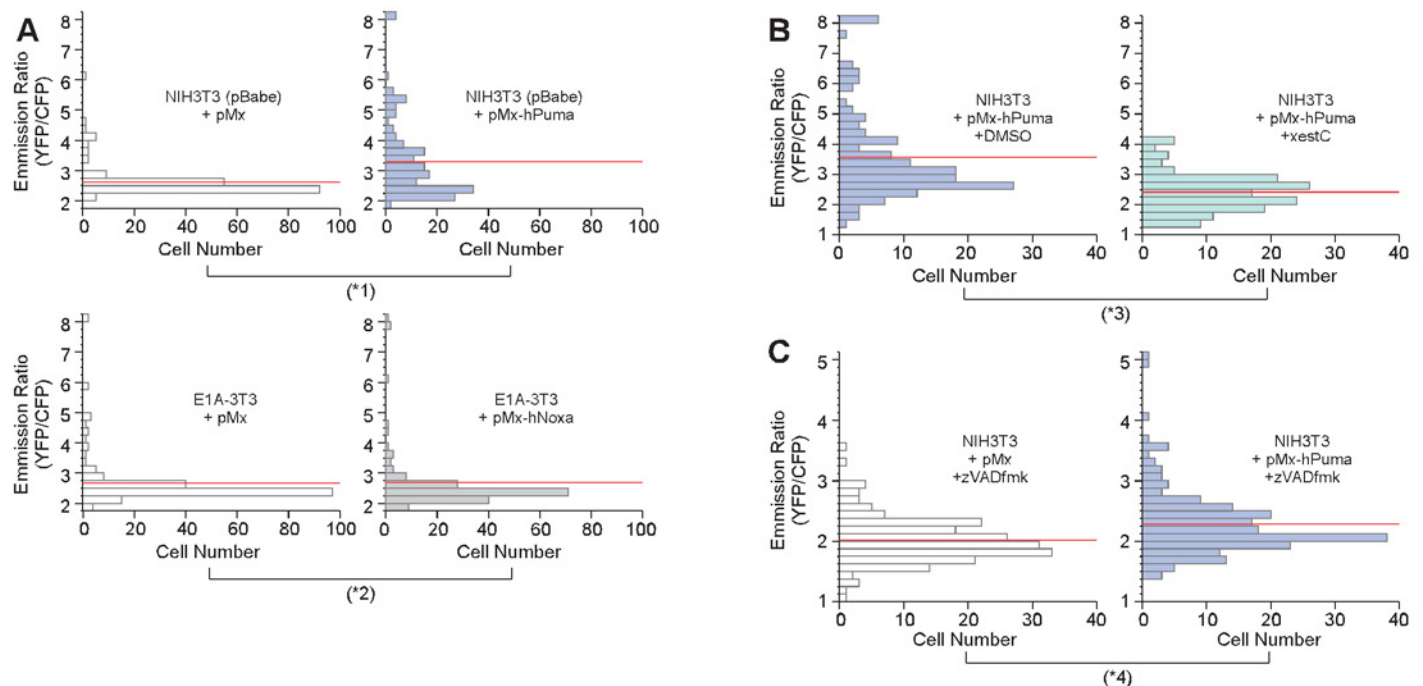

**Supplementary Figure 6** Fixed-time observation of the  $[\text{Ca}^{2+}]_c$  elevation during Puma-induced apoptosis.

(A)  $[\text{Ca}^{2+}]_c$  changes in Puma-expressing control NIH3T3 cells and Noxa-expressing E1A-3T3 cells. Control NIH3T3 cells and E1A-3T3 cells were nucleofected with the YC3.60 expression vector, together with pMx (control vector), pMx-hPuma or -hNoxa, and 10 h later, analyzed by fluorescence microscopy. The emission ratio (YFP/CFP) of the fluorescence intensity of CFP and YFP within the region drawn around an individual cell are calculated and plotted on the histograms (see Materials and methods). (\*1):  $p < 0.001$ ; (\*2):  $p > 0.3$

(B) Effect of xestospongins C (xestC) treatment on Puma-induced  $[\text{Ca}^{2+}]_c$  elevation.  $[\text{Ca}^{2+}]_c$  of Puma-expressing NIH3T3 cells were measured as described in (A), in the presence and absence of xestC. (\*3):  $p < 0.001$

(C) Puma-induced  $[\text{Ca}^{2+}]_c$  elevation in the presence of zVADfmk.  $[\text{Ca}^{2+}]_c$  of Puma-expressing NIH3T3 cells and that of control NIH3T3 cells were measured as described in (A), in the presence of zVADfmk. (\*4):  $p < 0.001$

In (A)-(C), red line indicates the average value, and the top bars in the histograms represent the numbers of cells with emission ratios of more than 8 (A, B) or 5 (C). PI-positive cells, which were supposed to have lost the plasma membrane integrity, were excluded from counting.
