# Supplementary material
Source: PubMed Central journal article supplement (PMC1618103)
Supplement: 7601359s5.pdf [file 7601359s5.pdf]

## Supplementary Figure 9

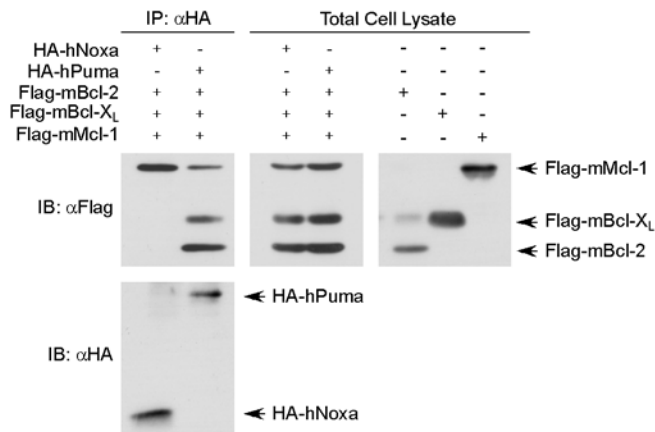**Supplementary Figure 9** Specificity of association of Noxa and Puma with prosurvival Bcl-2 family members.

The association of Noxa and Puma with three prosurvival members (Bcl-2, Bcl-X<sub>L</sub> and Mcl-1) was analyzed by immunoprecipitation (IP) with the anti-HA-tag rabbit polyclonal antibody, followed by immunoblotting (IB) with the anti-Flag-tag antibody, using 293T cells transiently transfected with the vectors expressing indicated proteins (see Materials and methods).

## Supplementary Figure 10

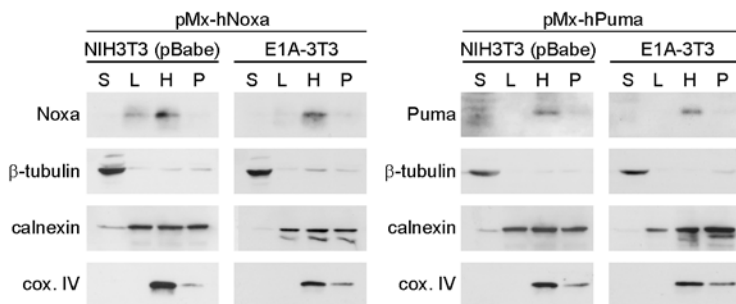**Supplementary Figure 10** Subcellular localizations of Noxa and Puma.

The localizations of Noxa and Puma in control NIH3T3 cells and E1A-3T3 cells were analyzed by subcellular fractionation in combination with immunoblotting. Irrespective of the presence of E1A, both Noxa and Puma were primarily detected in the HM fraction enriched for mitochondria. S, L, H and P represent S100, LM, HM and P0.6 fractions, respectively (see Materials and methods). Immunoblotting using antibodies to  $\beta$ -tubulin, calnexin and cytochrome oxidase IV (cox. IV), which predominantly localize in cytosol, on ER membranes and on mitochondrial membranes, respectively, was performed to assess the quality of fractionation.
